# Supplementary material for: Changing Landscape of Systemic Therapy in Biliary Tract Cancer
Source: MDPI journal article supplement (doi:10.3390/cancers14092137), 2022-04-25
Supplement: s1 [file s1]

# Supplementary Materials: Changing Landscape of Systemic Therapy in Biliary Tract Cancer

Edward Woods, Dat Le, Bharath Kumar Jakka, and Ashish Manne

**Table S1.** Comparing the trial data of three prominent trials with chemotherapy in the first line (this is not a head–head comparison).

|                              | GC/NP<br>(Shorff et al. [24])<br>(High dose vs. low<br>dose) | GC (vs Gem)<br>(ABC-02) | GC-D (vs GC-pla-<br>cebo)<br>(TOP AZ-1) |
|------------------------------|--------------------------------------------------------------|-------------------------|-----------------------------------------|
| Patient population           | BTC                                                          | BTC and AC              | BTC                                     |
| PFS (in months)              | 11.8 (11.4 vs 14.9)                                          | 8 (vs 5)                | 7.2 (vs 5.7)                            |
| OS (in months)               | 19.2 (19.5 vs 15.7)                                          | 11.7 (8.1)              | 12.8 (vs 11.5)                          |
|                              | >G3 AE(%)                                                    |                         |                                         |
| Neutropenia (%)              | 41 (42 vs 39)                                                | 25 (vs 17)              | 20 (vs 21)                              |
| Anemia (%)                   | 16 (19 vs 12)                                                | 8 (vs 3)                | 24 (vs 22)                              |
| Thrombocytopenia (%)         | 13 (16 vs 8)                                                 | 9 (vs 6)                | 5 (vs 5)                                |
| Fatigue (%)                  | 14                                                           | 19 (vs 17)              | 3 (vs 2)                                |
| Elevated ALP (%)             | 4 (3 vs 4)*                                                  | NR <sup>#</sup>         | Hepatic events -irAE,<br>(0.6 vs 0.3)   |
| Elevated ALT (%)             | 5 (3 vs 0)**                                                 | 10                      |                                         |
| Peripheral neuropathy<br>(%) | 2 (0 vs 4)***                                                | NR                      | NR                                      |
| Diarrhea (%)                 | 4 (3 vs 4)****                                               | NR                      | 0.3 vs 0.3                              |

BTC – biliary tract cancers include gall bladder cancers and cholangiocarcinoma; AC- ampullary cancer; GC – gemcitabine and cisplatin; Gem-gemcitabine, NP- nab-paclitaxel, D-durvalumab; NR- not reported; PFS – progression free survival; OS – overall survival; AE- adverse events; irAE – immune related adverse events; \*one patient each; \*\* one patient on the entire group; \*\*\* only one patient had neuropathy;\*\*\*\* one patient in each group #Abnormal liver function – 17 (vs 27) in GC
